# Supplementary material for: Time Limit of Gold Mineralization in Muping–Rushan Belt, Eastern Jiaodong Peninsula, China: Evidence from Muscovite Ar–Ar Dating
Source: MDPI journal article supplement (doi:10.3390/min12030278), 2022-02-23
Supplement: s1 [file s1]

Table S1  $^{40}\text{Ar}/^{39}\text{Ar}$  data of muscovite furnace stage heating in beresite of Sanjia gold deposit

|          | Relative<br>Abundances | $^{36}\text{Ar}$<br>[fA] | % $1\delta$ | $^{37}\text{Ar}$<br>[fA] | % $1\delta$ | $^{38}\text{Ar}$<br>[fA] | % $1\delta$ | $^{39}\text{Ar}$<br>[fA] | % $1\delta$ | $^{40}\text{Ar}$<br>[fA] | % $1\delta$ | $^{40}(\text{r})/$<br>$^{39}(\text{k})$ | $\pm 2\delta$ | Age<br>(Ma) | $\pm 2\delta$ | $^{40}\text{Ar}(\text{r})$<br>(%) | $^{39}\text{Ar}(\text{k})$<br>(%) | K/Ca | $\pm 2\delta$ |
|----------|------------------------|--------------------------|-------------|--------------------------|-------------|--------------------------|-------------|--------------------------|-------------|--------------------------|-------------|-----------------------------------------|---------------|-------------|---------------|-----------------------------------|-----------------------------------|------|---------------|
| 16D37405 | 0.4%                   | 0.24                     | 0.54        | 0.05                     | 384.41      | 0.19                     | 13.58       | 12.22                    | 0.20        | 312.79                   | 0.08        | 19.83                                   | 0.11          | 55.98       | 0.30          | 77.48                             | 1.10                              | 102  | $\pm 782$     |
| 16D37407 | 0.6%                   | 0.03                     | 2.58        | 0.10                     | 188.34      | 0.07                     | 36.91       | 3.73                     | 0.60        | 162.26                   | 0.15        | 40.92                                   | 0.52          | 113.70      | 1.41          | 94.16                             | 0.34                              | 16   | $\pm 58$      |
| 16D37408 | 0.9%                   | 0.05                     | 1.79        | 0.16                     | 129.10      | 0.08                     | 30.89       | 5.18                     | 0.45        | 240.05                   | 0.10        | 43.60                                   | 0.41          | 120.90      | 1.11          | 94.17                             | 0.47                              | 14   | $\pm 37$      |
| 16D37409 | 1.2%                   | 0.04                     | 1.94        | 0.23                     | 83.89       | 0.10                     | 25.84       | 5.45                     | 0.41        | 252.14                   | 0.10        | 43.84                                   | 0.38          | 121.54      | 1.01          | 94.82                             | 0.49                              | 10   | $\pm 17$      |
| 16D37410 | 1.4%                   | 0.07                     | 1.26        | 0.14                     | 143.52      | 0.11                     | 21.93       | 6.99                     | 0.33        | 313.54                   | 0.08        | 41.81                                   | 0.29          | 116.09      | 0.78          | 93.27                             | 0.63                              | 22   | $\pm 62$      |
| 16D37412 | 1.6%                   | 0.02                     | 5.03        | 0.02                     | 1115.54     | 0.09                     | 26.09       | 4.64                     | 0.48        | 196.57                   | 0.12        | 41.36                                   | 0.42          | 114.87      | 1.14          | 97.62                             | 0.42                              | 110  | $\pm 2455$    |
| 16D37413 | 1.8%                   | 0.02                     | 4.13        | 0.13                     | 154.89      | 0.09                     | 27.76       | 5.41                     | 0.42        | 230.24                   | 0.11        | 41.49                                   | 0.37          | 115.23      | 1.00          | 97.48                             | 0.49                              | 18   | $\pm 56$      |
| 16D37414 | 2.0%                   | 0.03                     | 2.52        | 0.13                     | 157.34      | 0.09                     | 28.58       | 6.09                     | 0.38        | 265.36                   | 0.09        | 41.94                                   | 0.34          | 116.45      | 0.90          | 96.32                             | 0.55                              | 20   | $\pm 64$      |
| 16D37415 | 2.2%                   | 0.08                     | 1.15        | 0.05                     | 419.77      | 0.14                     | 17.04       | 10.40                    | 0.22        | 465.71                   | 0.05        | 42.50                                   | 0.20          | 117.95      | 0.54          | 94.90                             | 0.93                              | 97   | $\pm 816$     |
| 16D37417 | 2.4%                   | 0.01                     | 6.28        | 0.10                     | 195.17      | 0.11                     | 22.42       | 7.81                     | 0.30        | 330.27                   | 0.07        | 41.82                                   | 0.27          | 116.10      | 0.72          | 98.85                             | 0.70                              | 32   | $\pm 126$     |
| 16D37419 | 2.6%                   | 0.01                     | 9.62        | 0.04                     | 535.99      | 0.09                     | 28.66       | 6.89                     | 0.32        | 285.76                   | 0.09        | 41.11                                   | 0.28          | 114.21      | 0.75          | 99.14                             | 0.62                              | 82   | $\pm 882$     |
| 16D37418 | 2.8%                   | 0.13                     | 0.77        | 0.21                     | 96.38       | 0.25                     | 9.08        | 16.58                    | 0.15        | 740.99                   | 0.03        | 42.33                                   | 0.14          | 117.47      | 0.37          | 94.73                             | 1.49                              | 34   | $\pm 66$      |
| 16D37420 | 3.0%                   | 0.07                     | 1.33        | 0.18                     | 109.03      | 0.25                     | 9.35        | 17.74                    | 0.15        | 751.07                   | 0.03        | 41.22                                   | 0.13          | 114.49      | 0.35          | 97.36                             | 1.59                              | 43   | $\pm 93$      |
| 16D37422 | 3.3%                   | 0.01                     | 5.78        | 0.13                     | 150.36      | 0.15                     | 16.56       | 12.69                    | 0.20        | 524.51                   | 0.05        | 41.01                                   | 0.18          | 113.94      | 0.47          | 99.21                             | 1.14                              | 41   | $\pm 124$     |
| 16D37423 | 3.6%                   | 0.05                     | 1.91        | 0.07                     | 262.38      | 0.32                     | 7.81        | 24.99                    | 0.12        | 1039.02                  | 0.02        | 41.03                                   | 0.10          | 113.98      | 0.28          | 98.66                             | 2.25                              | 145  | $\pm 762$     |
| 16D37424 | 3.9%                   | 0.02                     | 5.36        | 0.04                     | 487.89      | 0.28                     | 8.55        | 20.13                    | 0.13        | 822.90                   | 0.03        | 40.66                                   | 0.11          | 112.99      | 0.31          | 99.44                             | 1.81                              | 216  | $\pm 2108$    |
| 16D37425 | 4.2%                   | 0.01                     | 5.83        | 0.17                     | 115.82      | 0.32                     | 7.79        | 24.68                    | 0.11        | 1005.43                  | 0.02        | 40.56                                   | 0.10          | 112.72      | 0.26          | 99.58                             | 2.22                              | 62   | $\pm 143$     |
| 16D37427 | 4.5%                   | 0.01                     | 8.56        | 0.26                     | 74.67       | 0.27                     | 9.09        | 22.83                    | 0.12        | 928.55                   | 0.03        | 40.55                                   | 0.10          | 112.69      | 0.28          | 99.69                             | 2.05                              | 37   | $\pm 56$      |
| 16D37428 | 4.9%                   | 0.02                     | 4.57        | 0.01                     | 1603.65     | 0.34                     | 7.20        | 28.72                    | 0.11        | 1165.69                  | 0.02        | 40.40                                   | 0.09          | 112.30      | 0.24          | 99.53                             | 2.58                              | 998  | $\pm 32015$   |
| 16D37429 | 5.3%                   | 0.02                     | 4.50        | 0.07                     | 279.48      | 0.40                     | 6.01        | 33.68                    | 0.10        | 1365.33                  | 0.02        | 40.38                                   | 0.08          | 112.23      | 0.23          | 99.60                             | 3.03                              | 206  | $\pm 1153$    |
| 16D37430 | 5.9%                   | 0.03                     | 3.22        | 0.17                     | 113.58      | 0.50                     | 4.60        | 40.16                    | 0.09        | 1634.65                  | 0.02        | 40.51                                   | 0.08          | 112.58      | 0.20          | 99.52                             | 3.61                              | 100  | $\pm 228$     |
| 16D37432 | 6.5%                   | 0.02                     | 4.06        | 0.44                     | 45.19       | 0.58                     | 4.24        | 46.37                    | 0.09        | 1884.18                  | 0.01        | 40.50                                   | 0.07          | 112.56      | 0.19          | 99.67                             | 4.17                              | 45   | $\pm 41$      |

| Relative Abundances |       | <sup>36</sup> Ar [fA] | %1δ  | <sup>37</sup> Ar [fA] | %1δ    | <sup>38</sup> Ar [fA] | %1δ  | <sup>39</sup> Ar [fA] | %1δ  | <sup>40</sup> Ar [fA] | %1δ  | <sup>40</sup> (r)/ <sup>39</sup> (k) | ±2δ  | Age (Ma) | ±2δ  | <sup>40</sup> Ar(r) (%) | <sup>39</sup> Ar(k) (%) | K/Ca | ±2δ  |
|---------------------|-------|-----------------------|------|-----------------------|--------|-----------------------|------|-----------------------|------|-----------------------|------|--------------------------------------|------|----------|------|-------------------------|-------------------------|------|------|
| 16D37433            | 7.1%  | 0.04                  | 2.30 | 0.31                  | 63.91  | 0.58                  | 4.17 | 48.57                 | 0.09 | 1985.30               | 0.01 | 40.63                                | 0.07 | 112.92   | 0.19 | 99.41                   | 4.37                    | 68   | ±87  |
| 16D37434            | 7.7%  | 0.03                  | 3.09 | 0.29                  | 70.79  | 0.57                  | 4.23 | 47.27                 | 0.09 | 1941.71               | 0.01 | 40.90                                | 0.07 | 113.63   | 0.20 | 99.56                   | 4.25                    | 71   | ±101 |
| 16D37435            | 8.5%  | 0.02                  | 3.52 | 0.17                  | 120.58 | 0.65                  | 3.63 | 53.15                 | 0.08 | 2195.26               | 0.01 | 41.16                                | 0.07 | 114.34   | 0.19 | 99.66                   | 4.78                    | 135  | ±325 |
| 16D37437            | 9.2%  | 0.03                  | 3.31 | 0.36                  | 54.65  | 0.69                  | 3.39 | 57.38                 | 0.08 | 2377.74               | 0.01 | 41.30                                | 0.07 | 114.72   | 0.19 | 99.66                   | 5.16                    | 68   | ±75  |
| 16D37438            | 9.8%  | 0.02                  | 3.64 | 0.29                  | 69.32  | 0.80                  | 2.94 | 64.39                 | 0.08 | 2674.88               | 0.01 | 41.43                                | 0.07 | 115.06   | 0.18 | 99.73                   | 5.79                    | 95   | ±132 |
| 16D37439            | 10.5% | 0.02                  | 4.24 | 0.42                  | 49.28  | 0.95                  | 2.52 | 71.98                 | 0.08 | 2989.90               | 0.01 | 41.45                                | 0.07 | 115.11   | 0.18 | 99.78                   | 6.47                    | 74   | ±73  |
| 16D37440            | 11.2% | 0.02                  | 5.45 | 0.31                  | 65.42  | 0.91                  | 2.63 | 69.31                 | 0.08 | 2894.40               | 0.01 | 41.69                                | 0.07 | 115.75   | 0.18 | 99.83                   | 6.23                    | 96   | ±126 |
| 16D37442            | 11.8% | 0.02                  | 2.44 | 0.15                  | 115.06 | 0.53                  | 4.39 | 43.01                 | 0.09 | 1803.22               | 0.01 | 41.79                                | 0.08 | 116.04   | 0.21 | 99.68                   | 3.87                    | 121  | ±279 |
| 16D37443            | 12.2% | 0.02                  | 2.31 | 0.22                  | 77.15  | 0.50                  | 4.88 | 39.85                 | 0.09 | 1672.85               | 0.01 | 41.82                                | 0.08 | 116.12   | 0.21 | 99.63                   | 3.58                    | 76   | ±118 |
| 16D37444            | 12.6% | 0.02                  | 2.63 | 0.08                  | 212.69 | 0.44                  | 5.24 | 34.98                 | 0.10 | 1471.58               | 0.01 | 41.93                                | 0.08 | 116.40   | 0.23 | 99.65                   | 3.14                    | 181  | ±770 |
| 16D37445            | 13.0% | 0.01                  | 3.16 | 0.20                  | 89.27  | 0.35                  | 6.91 | 27.47                 | 0.11 | 1154.74               | 0.02 | 41.89                                | 0.10 | 116.29   | 0.26 | 99.64                   | 2.47                    | 60   | ±107 |
| 16D37447            | 13.5% | 0.01                  | 3.75 | 0.23                  | 72.10  | 0.27                  | 8.99 | 20.38                 | 0.13 | 857.71                | 0.02 | 41.94                                | 0.11 | 116.42   | 0.30 | 99.63                   | 1.83                    | 38   | ±55  |

|          | Relative<br>Abundances | <sup>36</sup> Ar<br>[fA] | %1δ  | <sup>37</sup> Ar<br>[fA] | %1δ     | <sup>38</sup> Ar<br>[fA] | %1δ        | <sup>39</sup> Ar<br>[fA] | %1δ  | <sup>40</sup> Ar<br>[fA] | %1δ  | <sup>40</sup> (r)/<br><sup>39</sup> (k) | ±2δ  | Age<br>(Ma) | ±2δ  | <sup>40</sup> Ar(r)<br>(%) | <sup>39</sup> Ar(k)<br>(%) | K/Ca | ±2δ   |
|----------|------------------------|--------------------------|------|--------------------------|---------|--------------------------|------------|--------------------------|------|--------------------------|------|-----------------------------------------|------|-------------|------|----------------------------|----------------------------|------|-------|
| 16D37448 | 14.0%                  | 0.02                     | 2.71 | 0.21                     | 82.38   | 0.29                     | 8.34       | 22.5<br>4                | 0.12 | 951.19                   | 0.02 | 41.99                                   | 0.11 | 116.57      | 0.28 | 99.51                      | 2.03                       | 46   | ±76   |
| 16D37449 | 14.5%                  | 0.01                     | 3.10 | 0.06                     | 275.37  | 0.24                     | 9.99       | 20.8<br>4                | 0.13 | 876.30                   | 0.02 | 41.87                                   | 0.11 | 116.25      | 0.29 | 99.56                      | 1.87                       | 144  | ±791  |
| 16D37451 | 15.0%                  | 0.02                     | 2.47 | 0.02                     | 1062.37 | 0.21                     | 11.13      | 15.4<br>8                | 0.16 | 655.10                   | 0.03 | 41.99                                   | 0.14 | 116.58      | 0.37 | 99.24                      | 1.39                       | 407  | ±8647 |
| 16D37452 | 15.5%                  | 0.01                     | 3.30 | 0.40                     | 44.12   | 0.22                     | 10.55      | 17.7<br>2                | 0.15 | 748.97                   | 0.02 | 42.06                                   | 0.13 | 116.75      | 0.35 | 99.51                      | 1.59                       | 19   | ±17   |
| 16D37453 | 16.0%                  | 0.01                     | 2.89 | 0.04                     | 458.96  | 0.19                     | 12.90      | 15.6<br>3                | 0.16 | 663.33                   | 0.03 | 42.16                                   | 0.14 | 117.02      | 0.38 | 99.36                      | 1.41                       | 181  | ±1658 |
| 16D37455 | 16.5%                  | 0.01                     | 4.06 | 0.03                     | 529.64  | 0.16                     | 14.76      | 12.5<br>8                | 0.20 | 530.61                   | 0.03 | 41.95                                   | 0.17 | 116.46      | 0.47 | 99.48                      | 1.13                       | 169  | ±1789 |
| 16D37456 | 17.0%                  | 0.01                     | 4.12 | 0.25                     | 65.47   | 0.14                     | 17.09      | 12.1<br>4                | 0.20 | 513.40                   | 0.03 | 42.06                                   | 0.17 | 116.75      | 0.46 | 99.43                      | 1.09                       | 21   | ±27   |
| 16D37457 | 17.5%                  | 0.01                     | 4.24 | 0.27                     | 64.65   | 0.13                     | 19.78      | 10.5<br>6                | 0.23 | 447.79                   | 0.04 | 42.15                                   | 0.20 | 116.99      | 0.52 | 99.39                      | 0.95                       | 17   | ±21   |
| 16D37458 | 18.0%                  | 0.01                     | 3.85 | 0.03                     | 582.96  | 0.09                     | 27.07      | 8.20                     | 0.28 | 346.79                   | 0.05 | 41.91                                   | 0.24 | 116.35      | 0.64 | 99.14                      | 0.74                       | 123  | ±1435 |
| 16D37460 | 18.5%                  | 0.01                     | 3.99 | 0.08                     | 218.72  | 0.08                     | 32.66      | 5.73                     | 0.41 | 246.96                   | 0.07 | 42.66                                   | 0.35 | 118.36      | 0.95 | 98.90                      | 0.51                       | 32   | ±142  |
| 16D37461 | 19.0%                  | 0.01                     | 5.84 | 0.05                     | 330.70  | 0.05                     | 50.54      | 5.39                     | 0.42 | 230.67                   | 0.08 | 42.43                                   | 0.37 | 117.75      | 0.98 | 99.21                      | 0.48                       | 43   | ±287  |
| 16D37462 | 19.5%                  | 0.01                     | 6.13 | 0.05                     | 329.22  | 0.06                     | 41.50      | 5.06                     | 0.46 | 214.64                   | 0.08 | 42.02                                   | 0.39 | 116.66      | 1.06 | 99.14                      | 0.46                       | 42   | ±279  |
| 16D37463 | 20.0%                  | 0.01                     | 5.35 | 0.06                     | 277.56  | 0.05                     | 42.65      | 4.77                     | 0.48 | 203.16                   | 0.09 | 42.15                                   | 0.42 | 117.01      | 1.12 | 99.00                      | 0.43                       | 32   | ±178  |
| 16D37465 | 20.5%                  | 0.00                     | 7.47 | 0.02                     | 1114.10 | 0.03                     | 71.71      | 3.70                     | 0.62 | 157.81                   | 0.11 | 42.31                                   | 0.54 | 117.44      | 1.44 | 99.11                      | 0.33                       | 100  | ±2227 |
| 16D37466 | 21.0%                  | 0.00                     | 7.54 | 0.06                     | 299.11  | 0.02                     | 103.4<br>5 | 3.93                     | 0.57 | 169.42                   | 0.10 | 42.75                                   | 0.50 | 118.62      | 1.34 | 99.16                      | 0.35                       | 29   | ±173  |

|          | Relative<br>Abundances | <sup>36</sup> Ar<br>[fA] | %1δ  | <sup>37</sup> Ar<br>[fA] | %1δ    | <sup>38</sup> Ar<br>[fA] | %1δ   | <sup>39</sup> Ar<br>[fA] | %1δ  | <sup>40</sup> Ar<br>[fA] | %1δ  | <sup>40</sup> (r)/<br><sup>39</sup> (k) | ±2δ  | Age<br>(Ma) | ±2δ  | <sup>40</sup> Ar(r)<br>(%) | <sup>39</sup> Ar(k)<br>(%) | K/Ca | ±2δ |
|----------|------------------------|--------------------------|------|--------------------------|--------|--------------------------|-------|--------------------------|------|--------------------------|------|-----------------------------------------|------|-------------|------|----------------------------|----------------------------|------|-----|
| 16D37467 | 21.6%                  | 0.00                     | 7.77 | 0.10                     | 180.09 | 0.02                     | 97.51 | 3.51                     | 0.63 | 151.49                   | 0.12 | 42.70                                   | 0.55 | 118.49      | 1.48 | 99.08                      | 0.32                       | 16   | ±57 |
| 16D37469 | 22.3%                  | 0.00                     | 7.50 | 0.47                     | 36.83  | 0.03                     | 72.43 | 3.40                     | 0.67 | 147.15                   | 0.12 | 42.85                                   | 0.59 | 118.88      | 1.57 | 99.06                      | 0.31                       | 3    | ±2  |

J value = 0.00158574 ± 0.00000316; Total gas age = 114.31±0.44 (2σ); The test was completed by Oregon State University

Table S2  $^{40}\text{Ar}/^{39}\text{Ar}$  data of muscovite furnace stage heating in quartz–sulfide vein of Xipo gold deposit

|          | Relative<br>Abundances | $^{36}\text{Ar}$<br>[fA] | %1 $\delta$ | $^{37}\text{Ar}$<br>[fA] | %1 $\delta$ | $^{38}\text{Ar}$<br>[fA] | %1 $\delta$ | $^{39}\text{Ar}$<br>[fA] | %1 $\delta$ | $^{40}\text{Ar}$<br>[fA] | %1 $\delta$ | $^{40}(\text{r})/^{39}(\text{k})$ | $\pm 2\delta$ | Age<br>(Ma) | $\pm 2\delta$ | $^{40}\text{Ar}(\text{r})$<br>(%) | $^{39}\text{Ar}(\text{k})$<br>(%) | K/Ca | $\pm 2\delta$ |
|----------|------------------------|--------------------------|-------------|--------------------------|-------------|--------------------------|-------------|--------------------------|-------------|--------------------------|-------------|-----------------------------------|---------------|-------------|---------------|-----------------------------------|-----------------------------------|------|---------------|
| 16D37474 | 0.4%                   | 0.56                     | 0.39        | 0.18                     | 97.12       | 0.21                     | 10.88       | 7.73                     | 0.31        | 438.08                   | 0.06        | 35.26                             | 0.28          | 98.52       | 0.77          | 62.21                             | 0.65                              | 18   | 35            |
| 16D37476 | 0.6%                   | 0.03                     | 2.22        | 0.04                     | 519.12      | 0.04                     | 55.13       | 2.00                     | 1.14        | 86.95                    | 0.30        | 38.41                             | 0.94          | 107.06      | 2.54          | 88.44                             | 0.17                              | 24   | 253           |
| 16D37477 | 0.9%                   | 0.07                     | 1.15        | 0.29                     | 59.82       | 0.11                     | 21.52       | 3.94                     | 0.55        | 178.49                   | 0.14        | 39.76                             | 0.47          | 110.73      | 1.28          | 87.67                             | 0.33                              | 6    | 7             |
| 16D37478 | 1.2%                   | 0.09                     | 0.98        | 0.13                     | 129.31      | 0.06                     | 37.19       | 5.93                     | 0.38        | 264.30                   | 0.10        | 40.06                             | 0.33          | 111.53      | 0.88          | 89.92                             | 0.50                              | 19   | 49            |
| 16D37479 | 1.4%                   | 0.04                     | 1.86        | 0.14                     | 116.75      | 0.09                     | 26.57       | 5.28                     | 0.44        | 224.84                   | 0.12        | 40.22                             | 0.38          | 111.95      | 1.01          | 94.38                             | 0.44                              | 16   | 38            |
| 16D37481 | 1.6%                   | 0.06                     | 1.38        | 0.06                     | 282.92      | 0.10                     | 22.77       | 6.63                     | 0.36        | 287.89                   | 0.09        | 40.75                             | 0.31          | 113.40      | 0.84          | 93.83                             | 0.56                              | 44   | 250           |
| 16D37482 | 1.8%                   | 0.05                     | 1.62        | 0.16                     | 109.48      | 0.09                     | 25.30       | 7.26                     | 0.31        | 313.22                   | 0.08        | 41.11                             | 0.27          | 114.37      | 0.73          | 95.26                             | 0.61                              | 19   | 42            |
| 16D37483 | 2.0%                   | 0.05                     | 1.76        | 0.19                     | 91.27       | 0.12                     | 18.72       | 8.36                     | 0.28        | 359.02                   | 0.07        | 41.37                             | 0.25          | 115.07      | 0.67          | 96.28                             | 0.70                              | 19   | 34            |
| 16D37484 | 2.2%                   | 0.05                     | 1.62        | 0.24                     | 75.86       | 0.14                     | 16.58       | 9.47                     | 0.25        | 412.12                   | 0.06        | 41.96                             | 0.22          | 116.65      | 0.59          | 96.42                             | 0.79                              | 17   | 26            |
| 16D37486 | 2.4%                   | 0.03                     | 2.33        | 0.10                     | 177.19      | 0.12                     | 18.99       | 9.37                     | 0.25        | 403.78                   | 0.06        | 42.04                             | 0.23          | 116.87      | 0.61          | 97.54                             | 0.79                              | 40   | 141           |
| 16D37488 | 2.6%                   | 0.02                     | 4.62        | 0.32                     | 56.52       | 0.11                     | 21.69       | 8.02                     | 0.28        | 343.41                   | 0.08        | 42.25                             | 0.25          | 117.43      | 0.69          | 98.63                             | 0.67                              | 11   | 12            |
| 16D37487 | 2.8%                   | 0.06                     | 1.45        | 0.11                     | 159.24      | 0.16                     | 14.20       | 14.89                    | 0.17        | 647.38                   | 0.04        | 42.34                             | 0.15          | 117.68      | 0.42          | 97.41                             | 1.25                              | 58   | 186           |
| 16D37489 | 3.0%                   | 0.03                     | 2.66        | 0.17                     | 105.10      | 0.20                     | 11.57       | 12.74                    | 0.19        | 552.92                   | 0.05        | 42.73                             | 0.17          | 118.71      | 0.46          | 98.47                             | 1.07                              | 31   | 66            |
| 16D37491 | 3.3%                   | 0.03                     | 2.70        | 0.13                     | 138.69      | 0.18                     | 12.68       | 14.38                    | 0.18        | 624.96                   | 0.04        | 42.86                             | 0.16          | 119.06      | 0.43          | 98.63                             | 1.21                              | 49   | 135           |
| 16D37492 | 3.6%                   | 0.03                     | 2.68        | 0.04                     | 476.98      | 0.21                     | 11.36       | 16.51                    | 0.15        | 716.62                   | 0.04        | 42.89                             | 0.14          | 119.15      | 0.37          | 98.79                             | 1.38                              | 189  | 1803          |
| 16D37493 | 3.9%                   | 0.02                     | 3.08        | 0.04                     | 443.43      | 0.18                     | 12.71       | 15.72                    | 0.16        | 684.99                   | 0.04        | 43.09                             | 0.14          | 119.70      | 0.39          | 98.93                             | 1.32                              | 168  | 1490          |
| 16D37494 | 4.2%                   | 0.03                     | 2.65        | 0.13                     | 132.20      | 0.27                     | 8.49        | 22.44                    | 0.13        | 980.85                   | 0.03        | 43.32                             | 0.11          | 120.31      | 0.30          | 99.11                             | 1.88                              | 74   | 195           |
| 16D37496 | 4.5%                   | 0.02                     | 3.32        | 0.25                     | 71.30       | 0.27                     | 8.60        | 20.14                    | 0.14        | 879.82                   | 0.03        | 43.35                             | 0.12          | 120.40      | 0.33          | 99.22                             | 1.69                              | 35   | 49            |
| 16D37497 | 4.9%                   | 0.02                     | 4.66        | 0.12                     | 152.02      | 0.18                     | 13.25       | 15.64                    | 0.16        | 685.88                   | 0.04        | 43.55                             | 0.15          | 120.93      | 0.40          | 99.29                             | 1.31                              | 56   | 171           |
| 16D37498 | 5.3%                   | 0.02                     | 4.13        | 0.04                     | 419.65      | 0.20                     | 11.72       | 16.21                    | 0.16        | 709.46                   | 0.04        | 43.42                             | 0.14          | 120.58      | 0.39          | 99.23                             | 1.36                              | 169  | 1418          |
| 16D37499 | 5.9%                   | 0.04                     | 2.03        | 0.06                     | 311.26      | 0.30                     | 7.52        | 25.59                    | 0.11        | 1118.43                  | 0.02        | 43.25                             | 0.10          | 120.12      | 0.28          | 98.96                             | 2.14                              | 196  | 1220          |
| 16D37501 | 6.5%                   | 0.08                     | 1.14        | 0.25                     | 69.79       | 0.76                     | 3.05        | 62.38                    | 0.08        | 2733.30                  | 0.01        | 43.44                             | 0.07          | 120.62      | 0.19          | 99.13                             | 5.23                              | 106  | 149           |

|          | Relative   | <sup>36</sup> Ar | <sup>36</sup> Ar | <sup>37</sup> Ar | <sup>37</sup> Ar | <sup>38</sup> Ar | <sup>38</sup> Ar | <sup>39</sup> Ar | <sup>39</sup> Ar | <sup>40</sup> Ar | <sup>40</sup> Ar | <sup>40</sup> (r)/ | ±2δ  | Age    | ±2δ  | <sup>40</sup> Ar(r) | <sup>39</sup> Ar(k) | K/Ca | ±2δ      |
|----------|------------|------------------|------------------|------------------|------------------|------------------|------------------|------------------|------------------|------------------|------------------|--------------------|------|--------|------|---------------------|---------------------|------|----------|
|          | Abundances | [fA]             | %1δ              | <sup>39</sup> (k)  |      | (Ma)   |      | (%)                 | (%)                 |      |          |
| 16D37502 | 7.1%       | 0.04             | 1.89             | 0.28             | 64.25            | 0.49             | 4.64             | 40.31            | 0.10             | 1768.10          | 0.01             | 43.55              | 0.08 | 120.92 | 0.23 | 99.28               | 3.38                | 61   | 79       |
| 16D37503 | 7.7%       | 0.05             | 1.60             | 0.04             | 455.45           | 0.73             | 3.23             | 58.12            | 0.08             | 2547.78          | 0.01             | 43.56              | 0.07 | 120.95 | 0.19 | 99.37               | 4.87                | 619  | 5640     |
| 16D37504 | 8.5%       | 0.08             | 1.12             | 0.28             | 63.01            | 1.06             | 2.14             | 87.79            | 0.08             | 3853.18          | 0.01             | 43.60              | 0.07 | 121.07 | 0.18 | 99.35               | 7.36                | 136  | 171      |
| 16D37506 | 9.2%       | 0.09             | 1.10             | 0.15             | 124.05           | 1.35             | 1.78             | 110.77           | 0.07             | 4860.48          | 0.01             | 43.63              | 0.07 | 121.15 | 0.17 | 99.44               | 9.28                | 318  | 789      |
| 16D37507 | 9.8%       | 0.05             | 1.60             | 0.18             | 100.57           | 0.94             | 2.53             | 76.34            | 0.08             | 3348.56          | 0.01             | 43.65              | 0.07 | 121.20 | 0.19 | 99.51               | 6.40                | 181  | 365      |
| 16D37508 | 10.5%      | 0.07             | 1.35             | 0.03             | 665.13           | 1.00             | 2.26             | 83.07            | 0.08             | 3650.12          | 0.01             | 43.70              | 0.07 | 121.34 | 0.18 | 99.46               | 6.96                | 1320 | 17561    |
| 16D37509 | 11.2%      | 0.08             | 1.18             | 0.29             | 63.50            | 0.76             | 3.09             | 62.03            | 0.08             | 2740.59          | 0.01             | 43.81              | 0.07 | 121.61 | 0.19 | 99.15               | 5.20                | 93   | 118      |
| 16D37511 | 11.8%      | 0.08             | 1.17             | 0.19             | 92.00            | 0.99             | 2.27             | 81.81            | 0.08             | 3602.81          | 0.01             | 43.75              | 0.07 | 121.47 | 0.18 | 99.35               | 6.86                | 188  | 345      |
| 16D37512 | 12.2%      | 0.03             | 2.60             | 0.08             | 236.52           | 0.52             | 4.48             | 45.12            | 0.09             | 1984.48          | 0.01             | 43.77              | 0.08 | 121.52 | 0.21 | 99.53               | 3.78                | 258  | 1219     |
| 16D37513 | 12.6%      | 0.04             | 2.04             | 0.39             | 47.08            | 0.79             | 2.84             | 64.67            | 0.08             | 2842.83          | 0.01             | 43.77              | 0.07 | 121.51 | 0.19 | 99.56               | 5.42                | 70   | 66       |
| 16D37514 | 13.0%      | 0.03             | 2.44             | 0.01             | 2188.77          | 0.47             | 4.62             | 39.63            | 0.09             | 1749.47          | 0.02             | 43.89              | 0.08 | 121.85 | 0.23 | 99.43               | 3.32                | 2170 | 94979    |
| 16D37516 | 13.5%      | 0.02             | 3.24             | 0.32             | 57.01            | 0.24             | 9.74             | 21.27            | 0.13             | 940.65           | 0.03             | 43.88              | 0.12 | 121.82 | 0.33 | 99.24               | 1.78                | 29   | 33       |
| 16D37517 | 14.0%      | 0.02             | 3.29             | 0.10             | 174.02           | 0.17             | 13.26            | 13.87            | 0.19             | 616.17           | 0.04             | 43.91              | 0.17 | 121.90 | 0.46 | 98.88               | 1.16                | 59   | 207      |
| 16D37518 | 14.5%      | 0.02             | 3.86             | 0.42             | 42.20            | 0.12             | 18.55            | 9.27             | 0.26             | 415.23           | 0.06             | 44.17              | 0.24 | 122.60 | 0.64 | 98.61               | 0.78                | 10   | 8        |
| 16D37520 | 15.0%      | 0.03             | 2.51             | 0.02             | 988.94           | 0.16             | 15.22            | 11.91            | 0.21             | 532.04           | 0.05             | 43.90              | 0.20 | 121.86 | 0.53 | 98.28               | 1.00                | 288  | 5689     |
| 16D37521 | 15.5%      | 0.02             | 4.53             | 0.25             | 72.54            | 0.09             | 26.97            | 7.88             | 0.31             | 351.59           | 0.07             | 44.00              | 0.28 | 122.13 | 0.76 | 98.63               | 0.66                | 14   | ±20      |
| 16D37522 | 16.0%      | 0.02             | 3.88             | 0.06             | 276.98           | 0.10             | 23.80            | 7.98             | 0.29             | 356.04           | 0.07             | 43.91              | 0.27 | 121.89 | 0.73 | 98.38               | 0.67                | 56   | ±309     |
| 16D37524 | 16.5%      | 0.02             | 3.88             | 0.20             | 94.45            | 0.19             | 12.48            | 12.76            | 0.18             | 566.86           | 0.05             | 43.99              | 0.17 | 122.10 | 0.45 | 98.99               | 1.07                | 27   | ±51      |
| 16D37525 | 17.0%      | 0.01             | 5.28             | 0.50             | 34.99            | 0.16             | 15.38            | 10.40            | 0.22             | 459.38           | 0.06             | 43.79              | 0.20 | 121.58 | 0.54 | 99.10               | 0.87                | 9    | ±6       |
| 16D37526 | 17.5%      | 0.01             | 7.12             | 0.15             | 116.09           | 0.07             | 31.36            | 5.79             | 0.39             | 257.14           | 0.10             | 43.89              | 0.36 | 121.83 | 0.96 | 98.81               | 0.49                | 16   | ±37      |
| 16D37527 | 18.0%      | 0.01             | 6.35             | 0.15             | 119.57           | 0.12             | 19.08            | 6.39             | 0.38             | 283.22           | 0.09             | 43.77              | 0.35 | 121.52 | 0.93 | 98.80               | 0.54                | 18   | ±42      |
| 16D37529 | 18.5%      | 0.01             | 6.19             | 0.18             | 99.25            | 0.11             | 21.75            | 5.60             | 0.41             | 251.53           | 0.10             | 44.26              | 0.38 | 122.83 | 1.03 | 98.59               | 0.47                | 13   | ±26      |
| 16D37530 | 19.0%      | 0.01             | 9.33             | 0.00             | 34476.32         | 0.05             | 49.40            | 2.90             | 0.78             | 131.79           | 0.20             | 44.67              | 0.74 | 123.94 | 1.98 | 98.23               | 0.24                | 2272 | ±1566595 |
| 16D37531 | 19.5%      | 0.01             | 10.0             | 0.28             | 67.85            | 0.04             | 55.60            | 1.80             | 1.24             | 81.17            | 0.32             | 43.96              | 1.15 | 122.02 | 3.09 | 97.38               | 0.15                | 3    | ±4       |

|          | Relative<br>Abundances | <sup>36</sup> Ar<br>[fA] | <sup>36</sup> Ar<br>%1δ | <sup>37</sup> Ar<br>[fA] | <sup>37</sup> Ar<br>%1δ | <sup>38</sup> Ar<br>[fA] | <sup>38</sup> Ar<br>%1δ | <sup>39</sup> Ar<br>[fA] | <sup>39</sup> Ar<br>%1δ | <sup>40</sup> Ar<br>[fA] | <sup>40</sup> Ar<br>%1δ | <sup>40</sup> (r)/<br><sup>39</sup> (k) | ±2δ  | Age<br>(Ma) | ±2δ   | <sup>40</sup> Ar(r)<br>(%) | <sup>39</sup> Ar(k)<br>(%) | K/Ca | ±2δ   |
|----------|------------------------|--------------------------|-------------------------|--------------------------|-------------------------|--------------------------|-------------------------|--------------------------|-------------------------|--------------------------|-------------------------|-----------------------------------------|------|-------------|-------|----------------------------|----------------------------|------|-------|
|          |                        |                          | 5                       |                          |                         |                          |                         |                          |                         |                          |                         |                                         |      |             |       |                            |                            |      |       |
| 16D37532 | 20.0%                  | 0.01                     | 8.81                    | 0.01                     | 1328.44                 | 0.02                     | 104.1<br>3              | 2.99                     | 0.76                    | 135.24                   | 0.19                    | 44.45                                   | 0.71 | 123.34      | 1.91  | 98.20                      | 0.25                       | 93   | ±2463 |
| 16D37534 | 20.5%                  | 0.01                     | 7.39                    | 0.04                     | 421.90                  | 0.05                     | 43.96                   | 3.26                     | 0.68                    | 148.59                   | 0.17                    | 44.68                                   | 0.64 | 123.95      | 1.73  | 98.00                      | 0.27                       | 33   | ±278  |
| 16D37535 | 21.0%                  | 0.01                     | 7.28                    | 0.09                     | 205.23                  | 0.05                     | 47.54                   | 3.49                     | 0.65                    | 157.59                   | 0.16                    | 44.31                                   | 0.61 | 122.97      | 1.62  | 98.13                      | 0.29                       | 18   | ±72   |
| 16D37536 | 21.6%                  | 0.01                     | 7.79                    | 0.21                     | 90.20                   | 0.05                     | 50.21                   | 2.08                     | 1.09                    | 96.15                    | 0.27                    | 44.93                                   | 1.03 | 124.64      | 2.76  | 97.16                      | 0.17                       | 4    | ±8    |
| 16D37538 | 22.3%                  | 0.01                     | 5.98                    | 0.08                     | 223.73                  | 0.03                     | 86.67                   | 3.36                     | 0.67                    | 154.60                   | 0.17                    | 44.96                                   | 0.63 | 124.71      | ±1.70 | 97.66                      | 0.28                       | 17   | ±78   |

J value = 0.00158805 ± 0.00000316; Total gas age = 120.62±0.47 (2σ); The test was completed by Oregon State University

Table S3  $^{40}\text{Ar}/^{39}\text{Ar}$  data of muscovite furnace stage heating in quartz–sulfide vein of Yinggezhuang gold deposit

|          | Relative<br>Abundances | $^{36}\text{Ar}$<br>[fA] | %1 $\delta$ | $^{37}\text{Ar}$<br>[fA] | %1 $\delta$ | $^{38}\text{Ar}$<br>[fA] | %1 $\delta$ | $^{39}\text{Ar}$<br>[fA] | %1 $\delta$ | $^{40}\text{Ar}$<br>[fA] | %1 $\delta$ | $^{40}(\text{r})/^{39}(\text{k})$ | $\pm 2\delta$ | Age<br>(Ma) | $\pm 2\delta$ | $^{40}\text{Ar}(\text{r})$<br>(%) | $^{39}\text{Ar}(\text{k})$<br>(%) | K/Ca | $\pm 2\delta$ |
|----------|------------------------|--------------------------|-------------|--------------------------|-------------|--------------------------|-------------|--------------------------|-------------|--------------------------|-------------|-----------------------------------|---------------|-------------|---------------|-----------------------------------|-----------------------------------|------|---------------|
| 16D36049 | 0.3%                   | 0.12                     | 0.62        | 0.03                     | 403.12      | 0.14                     | 17.20       | 9.48                     | 0.33        | 172.60                   | 0.43        | 14.61                             | 0.19          | 41.34       | 0.53          | 80.27                             | 0.80                              | 120  | $\pm 966$     |
| 16D36050 | 0.4%                   | 0.07                     | 0.89        | 0.16                     | 89.77       | 0.17                     | 14.40       | 9.34                     | 0.34        | 345.71                   | 0.22        | 34.78                             | 0.29          | 96.91       | 0.78          | 94.01                             | 0.79                              | 26   | $\pm 46$      |
| 16D36051 | 0.5%                   | 0.03                     | 1.92        | 0.18                     | 73.57       | 0.08                     | 30.83       | 4.27                     | 0.73        | 189.90                   | 0.39        | 42.67                             | 0.72          | 118.20      | 1.93          | 95.86                             | 0.36                              | 10   | $\pm 15$      |
| 16D36052 | 0.6%                   | 0.02                     | 2.35        | 0.02                     | 588.86      | 0.07                     | 33.33       | 3.83                     | 0.78        | 174.08                   | 0.43        | 43.78                             | 0.79          | 121.16      | 2.12          | 96.41                             | 0.32                              | 71   | $\pm 838$     |
| 16D36054 | 0.7%                   | 0.03                     | 1.89        | 0.05                     | 284.89      | 0.09                     | 29.64       | 5.11                     | 0.60        | 228.35                   | 0.33        | 43.18                             | 0.59          | 119.54      | 1.59          | 96.66                             | 0.43                              | 46   | $\pm 265$     |
| 16D36055 | 0.8%                   | 0.03                     | 1.66        | 0.01                     | 1319.92     | 0.07                     | 32.39       | 4.69                     | 0.68        | 213.29                   | 0.35        | 43.77                             | 0.68          | 121.14      | 1.81          | 96.16                             | 0.40                              | 197  | $\pm 5211$    |
| 16D36056 | 0.9%                   | 0.03                     | 1.84        | 0.05                     | 296.90      | 0.09                     | 27.21       | 5.71                     | 0.54        | 254.49                   | 0.29        | 43.22                             | 0.54          | 119.65      | 1.44          | 96.99                             | 0.48                              | 54   | $\pm 322$     |
| 16D36057 | 1.0%                   | 0.02                     | 2.25        | 0.21                     | 60.75       | 0.07                     | 34.29       | 5.15                     | 0.60        | 231.01                   | 0.32        | 43.67                             | 0.61          | 120.86      | 1.62          | 97.36                             | 0.43                              | 10   | $\pm 13$      |
| 16D36059 | 1.1%                   | 0.02                     | 2.21        | 0.00                     | 4410.93     | 0.08                     | 29.89       | 5.72                     | 0.54        | 255.49                   | 0.29        | 43.59                             | 0.54          | 120.64      | 1.44          | 97.63                             | 0.48                              | 783  | $\pm 69077$   |
| 16D36060 | 1.2%                   | 0.02                     | 2.03        | 0.02                     | 871.17      | 0.08                     | 31.64       | 7.08                     | 0.45        | 326.01                   | 0.23        | 45.08                             | 0.46          | 124.63      | 1.22          | 97.91                             | 0.60                              | 195  | $\pm 3391$    |
| 16D36061 | 1.3%                   | 0.02                     | 2.30        | 0.04                     | 305.17      | 0.10                     | 24.75       | 7.48                     | 0.40        | 338.48                   | 0.22        | 44.50                             | 0.41          | 123.10      | 1.10          | 98.29                             | 0.63                              | 72   | $\pm 438$     |
| 16D36062 | 1.4%                   | 0.04                     | 1.13        | 0.00                     | 3309.29     | 0.13                     | 19.30       | 8.75                     | 0.36        | 402.48                   | 0.19        | 44.47                             | 0.36          | 123.01      | 0.98          | 96.71                             | 0.74                              | 942  | $\pm 62316$   |
| 16D36063 | 1.5%                   | 0.02                     | 2.38        | 0.00                     | 8448.00     | 0.10                     | 24.45       | 8.96                     | 0.36        | 396.95                   | 0.19        | 43.65                             | 0.36          | 120.82      | 0.95          | 98.51                             | 0.76                              | 2340 | $\pm 395382$  |
| 16D36065 | 1.6%                   | 0.02                     | 2.16        | 0.15                     | 91.13       | 0.13                     | 18.21       | 10.84                    | 0.30        | 481.59                   | 0.16        | 43.80                             | 0.30          | 121.21      | 0.79          | 98.62                             | 0.91                              | 32   | $\pm 58$      |
| 16D36066 | 1.7%                   | 0.02                     | 2.27        | 0.07                     | 186.66      | 0.16                     | 15.52       | 12.17                    | 0.26        | 542.89                   | 0.14        | 44.10                             | 0.27          | 122.01      | 0.71          | 98.83                             | 1.03                              | 72   | $\pm 268$     |
| 16D36067 | 1.8%                   | 0.02                     | 2.42        | 0.17                     | 82.92       | 0.15                     | 15.64       | 12.05                    | 0.27        | 538.80                   | 0.14        | 44.22                             | 0.27          | 122.32      | 0.73          | 98.90                             | 1.02                              | 30   | $\pm 51$      |
| 16D36068 | 1.9%                   | 0.02                     | 2.01        | 0.05                     | 308.01      | 0.17                     | 14.24       | 13.85                    | 0.24        | 620.30                   | 0.12        | 44.26                             | 0.24          | 122.44      | 0.65          | 98.84                             | 1.17                              | 131  | $\pm 805$     |
| 16D36070 | 2.0%                   | 0.02                     | 2.52        | 0.17                     | 81.50       | 0.17                     | 14.16       | 14.28                    | 0.22        | 631.21                   | 0.12        | 43.81                             | 0.22          | 121.23      | 0.59          | 99.11                             | 1.20                              | 37   | $\pm 60$      |
| 16D36071 | 2.1%                   | 0.02                     | 2.79        | 0.04                     | 319.06      | 0.17                     | 14.49       | 13.85                    | 0.24        | 617.69                   | 0.12        | 44.27                             | 0.24          | 122.46      | 0.65          | 99.23                             | 1.17                              | 138  | $\pm 878$     |
| 16D36072 | 2.2%                   | 0.02                     | 2.76        | 0.05                     | 287.41      | 0.19                     | 12.70       | 16.35                    | 0.20        | 722.30                   | 0.10        | 43.87                             | 0.20          | 121.39      | 0.54          | 99.31                             | 1.38                              | 150  | $\pm 864$     |
| 16D36073 | 2.3%                   | 0.01                     | 3.05        | 0.04                     | 336.68      | 0.20                     | 12.31       | 15.97                    | 0.21        | 708.96                   | 0.11        | 44.12                             | 0.21          | 122.07      | 0.56          | 99.37                             | 1.35                              | 163  | $\pm 1096$    |
| 16D36075 | 2.4%                   | 0.02                     | 2.94        | 0.09                     | 155.28      | 0.22                     | 11.27       | 17.51                    | 0.19        | 777.86                   | 0.10        | 44.16                             | 0.19          | 122.17      | 0.50          | 99.41                             | 1.48                              | 88   | $\pm 273$     |



|          | Relative<br>Abundances | <sup>36</sup> Ar<br>[fA] | %1δ  | <sup>37</sup> Ar<br>[fA] | %1δ     | <sup>38</sup> Ar<br>[fA] | %1δ  | <sup>39</sup> Ar<br>[fA] | %1δ  | <sup>40</sup> Ar<br>[fA] | %1δ  | <sup>40</sup> (r)/<br><sup>39</sup> (k) | ±2δ  | Age<br>(Ma) | ±2δ  | <sup>40</sup> Ar(r)<br>(%) | <sup>39</sup> Ar(k)<br>(%) | K/Ca | ±2δ    |
|----------|------------------------|--------------------------|------|--------------------------|---------|--------------------------|------|--------------------------|------|--------------------------|------|-----------------------------------------|------|-------------|------|----------------------------|----------------------------|------|--------|
| 16D36076 | 2.6%                   | 0.02                     | 2.34 | 0.02                     | 877.99  | 0.32                     | 8.22 | 24.39                    | 0.15 | 1078.31                  | 0.07 | 43.97                                   | 0.14 | 121.66      | 0.38 | 99.45                      | 2.06                       | 684  | ±12008 |
| 16D36077 | 2.8%                   | 0.03                     | 1.94 | 0.10                     | 132.08  | 0.34                     | 7.44 | 30.31                    | 0.13 | 1342.63                  | 0.06 | 44.04                                   | 0.12 | 121.85      | 0.33 | 99.42                      | 2.56                       | 127  | ±335   |
| 16D36078 | 3.0%                   | 0.03                     | 1.93 | 0.07                     | 184.40  | 0.42                     | 5.87 | 34.42                    | 0.12 | 1519.28                  | 0.05 | 43.92                                   | 0.11 | 121.52      | 0.30 | 99.49                      | 2.90                       | 212  | ±783   |
| 16D36079 | 3.2%                   | 0.02                     | 2.30 | 0.01                     | 1136.82 | 0.41                     | 6.06 | 33.66                    | 0.12 | 1481.60                  | 0.05 | 43.82                                   | 0.11 | 121.28      | 0.31 | 99.56                      | 2.84                       | 1224 | ±27840 |
| 16D36081 | 3.4%                   | 0.04                     | 1.52 | 0.05                     | 281.57  | 0.47                     | 5.07 | 39.21                    | 0.11 | 1730.03                  | 0.04 | 43.84                                   | 0.10 | 121.33      | 0.28 | 99.36                      | 3.31                       | 345  | ±1945  |
| 16D36082 | 3.7%                   | 0.03                     | 1.50 | 0.15                     | 90.89   | 0.60                     | 4.16 | 48.71                    | 0.10 | 2137.81                  | 0.04 | 43.67                                   | 0.09 | 120.87      | 0.24 | 99.51                      | 4.11                       | 139  | ±252   |
| 16D36083 | 4.0%                   | 0.03                     | 1.68 | 0.09                     | 151.90  | 0.57                     | 4.33 | 48.31                    | 0.10 | 2121.09                  | 0.04 | 43.70                                   | 0.09 | 120.94      | 0.25 | 99.53                      | 4.08                       | 229  | ±695   |
| 16D36084 | 4.3%                   | 0.04                     | 1.52 | 0.04                     | 327.73  | 0.57                     | 4.26 | 44.90                    | 0.10 | 1966.23                  | 0.04 | 43.55                                   | 0.09 | 120.54      | 0.25 | 99.45                      | 3.79                       | 492  | ±3225  |
| 16D36085 | 4.7%                   | 0.04                     | 1.49 | 0.10                     | 130.41  | 0.57                     | 4.44 | 49.82                    | 0.10 | 2175.06                  | 0.03 | 43.44                                   | 0.09 | 120.25      | 0.24 | 99.50                      | 4.20                       | 210  | ±547   |
| 16D36087 | 5.0%                   | 0.04                     | 1.44 | 0.04                     | 379.26  | 0.71                     | 3.36 | 58.32                    | 0.09 | 2545.65                  | 0.03 | 43.42                                   | 0.08 | 120.19      | 0.23 | 99.48                      | 4.92                       | 714  | ±5417  |
| 16D36088 | 5.3%                   | 0.03                     | 1.69 | 0.21                     | 65.01   | 0.65                     | 3.74 | 54.32                    | 0.09 | 2369.14                  | 0.03 | 43.44                                   | 0.09 | 120.24      | 0.23 | 99.60                      | 4.58                       | 114  | ±148   |
| 16D36089 | 5.7%                   | 0.03                     | 1.69 | 0.15                     | 92.17   | 0.77                     | 3.04 | 62.72                    | 0.09 | 2730.73                  | 0.03 | 43.38                                   | 0.08 | 120.08      | 0.22 | 99.63                      | 5.29                       | 186  | ±342   |
| 16D36090 | 6.0%                   | 0.03                     | 1.96 | 0.23                     | 60.16   | 0.64                     | 3.74 | 53.21                    | 0.10 | 2318.65                  | 0.03 | 43.42                                   | 0.09 | 120.20      | 0.24 | 99.64                      | 4.49                       | 101  | ±122   |
| 16D36092 | 6.4%                   | 0.04                     | 1.50 | 0.13                     | 111.71  | 1.00                     | 2.41 | 79.68                    | 0.08 | 3466.24                  | 0.02 | 43.35                                   | 0.08 | 120.00      | 0.20 | 99.64                      | 6.72                       | 271  | ±604   |
| 16D36093 | 6.8%                   | 0.07                     | 0.98 | 0.75                     | 18.47   | 0.92                     | 2.52 | 74.14                    | 0.08 | 3330.23                  | 0.02 | 44.64                                   | 0.08 | 123.47      | 0.21 | 99.39                      | 6.26                       | 43   | ±16    |
| 16D36094 | 7.2%                   | 0.04                     | 1.43 | 0.14                     | 100.23  | 0.94                     | 2.46 | 75.97                    | 0.08 | 3302.36                  | 0.02 | 43.30                                   | 0.08 | 119.87      | 0.20 | 99.61                      | 6.41                       | 236  | ±474   |
| 16D36095 | 7.6%                   | 0.04                     | 1.49 | 0.20                     | 66.30   | 0.97                     | 2.60 | 80.48                    | 0.08 | 3495.02                  | 0.02 | 43.27                                   | 0.08 | 119.79      | 0.20 | 99.64                      | 6.79                       | 169  | ±224   |
| 16D36096 | 8.0%                   | 0.04                     | 1.58 | 0.24                     | 58.35   | 0.97                     | 2.41 | 80.24                    | 0.08 | 3481.78                  | 0.02 | 43.25                                   | 0.07 | 119.74      | 0.20 | 99.67                      | 6.77                       | 145  | ±170   |

J value = 0.00158282 ± 0.00000242; Total gas age = 120.01 ± 0.36 (2σ); The test was completed by Oregon State University
